# Supplementary material for: Cell deconvolution-based integrated time-series network of whole blood transcriptome reveals systemic antiviral activities and cell-specific immunological changes against PRRSV infection
Source: Springer Nature journal article supplement (doi:10.1186/s13567-025-01451-w), 2025-01-22

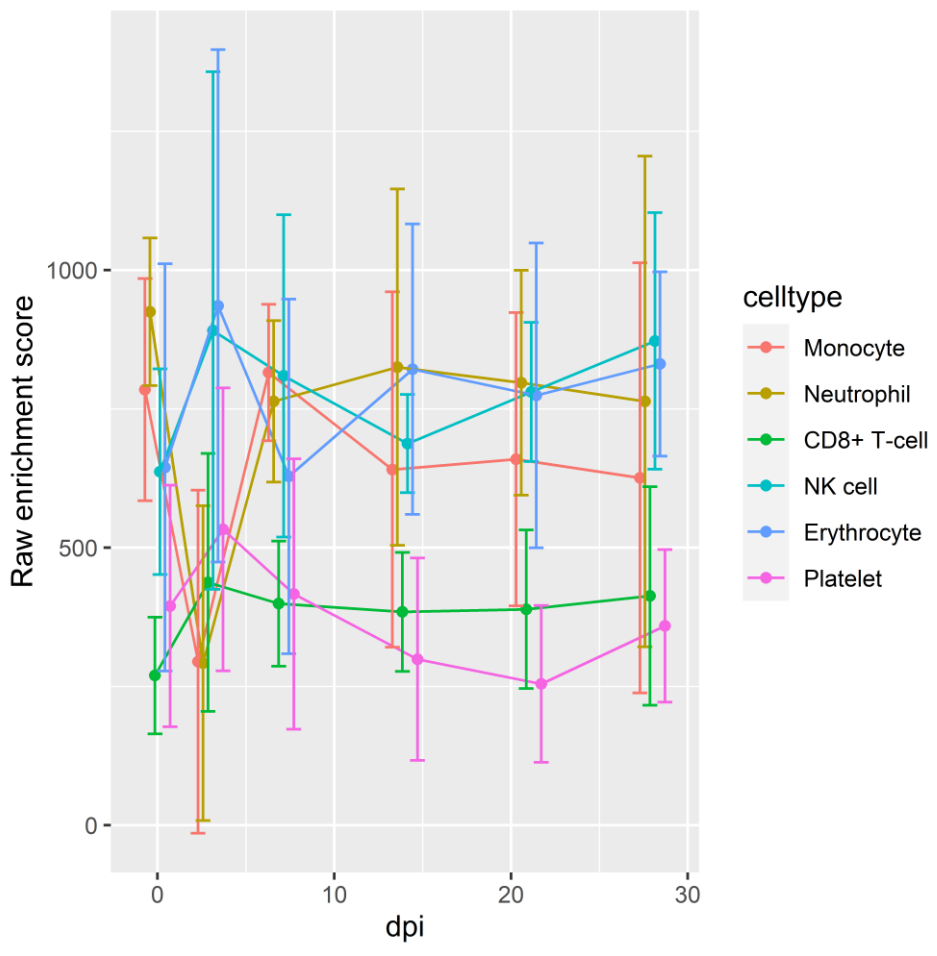

Supplement: MOESM6 [file 13567_2025_1451_MOESM6_ESM.pdf]
